# Supplementary material
Source: publisher figshare collection journal article supplement (https://frontiersin.figshare.com/ndownloader/files/21484191)
Supplement: Supplementary file [file 21484191]

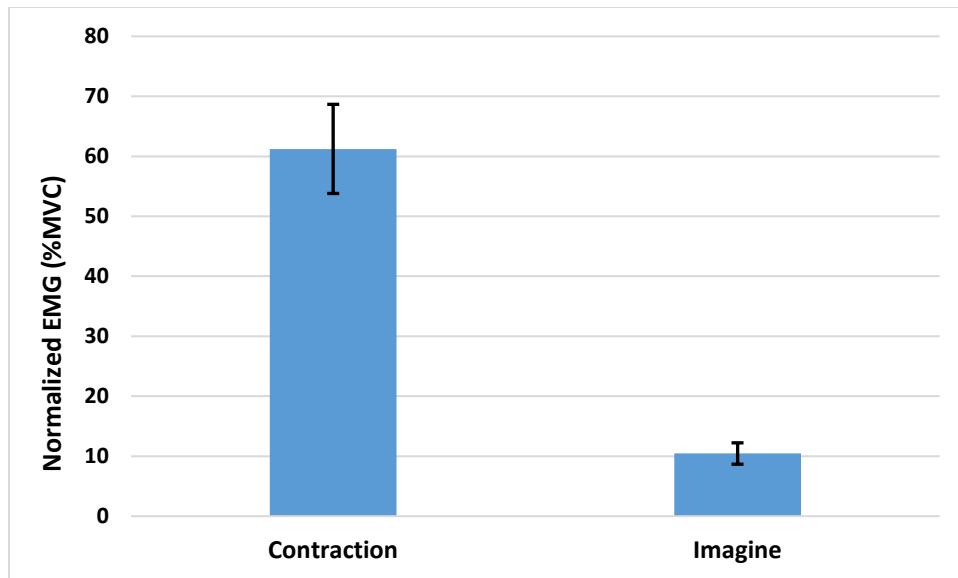

The data presented illustrates the EMG activity during physical contraction (average peak value during 5 bursts) and the peak value observed during imagined contractions. All data were normalized to the Maximum voluntary Isometric Contraction (MVC) of the same limb. MVC contractions were completed prior to the start of the experiment. An amplitude analysis was conducted by using a windowed RMS filter (window size = 0.125 seconds, window overlap = 0.0625 seconds) then dividing by the peak value during the MVC trial (EMGWorks Analysis version 4.7.3.0, Delsys, Inc., Boston, MA).
